# Supplementary material
Source: PubMed Central journal article supplement (PMC11477831)
Supplement: ajcr0014-4495-f5.pdf [file ajcr0014-4495-f5.pdf]

## Predicting CRC chromosomal instability

### A Tile-based approach

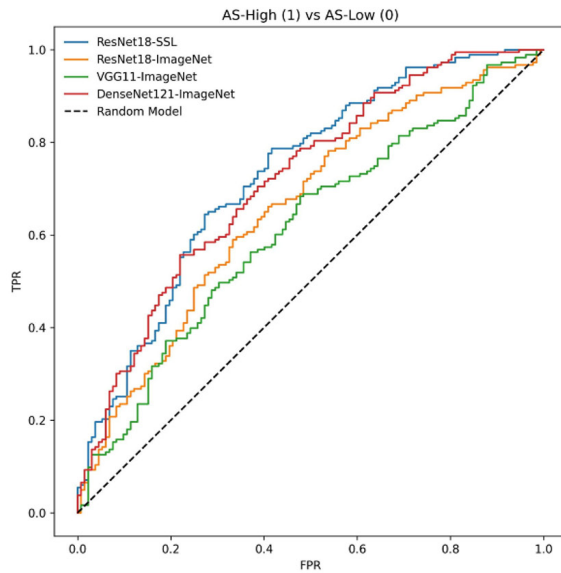

### B Nucleus-based approach

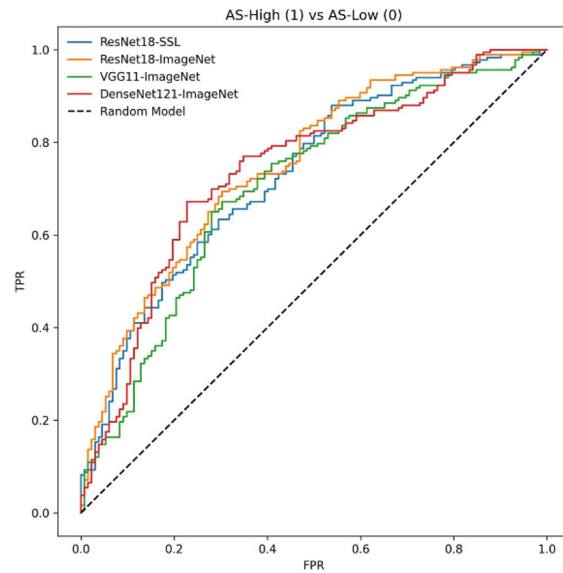

**Supplementary Figure 1.** AUROC for tile-based and nucleus-based models. A: Comparing AUROC for each model in tile-based predictions. B: Comparing AUROC for each model in nucleus-based predictions.

**Supplementary Table 1.** Prediction of binarized FGA and WGD

|                     | Accuracy (SD) | AUROC (SD)    | F1 (SD)       |
|---------------------|---------------|---------------|---------------|
| WGD                 | 0.673 (0.046) | 0.750 (0.053) | 0.632 (0.055) |
| FGA (threshold 0.2) | 0.679 (0.038) | 0.695 (0.039) | 0.749 (0.032) |

**Supplementary Table 2.** Prediction of AS with and without MSI-high cases

|                          | MSI cases | Accuracy (SD) | AUROC (SD)    | F1 (SD)       | Sensitivity (SD) | Specificity (SD) |
|--------------------------|-----------|---------------|---------------|---------------|------------------|------------------|
| Tile-based Model         | Include   | 0.686 (0.038) | 0.742 (0.023) | 0.735 (0.040) | 0.754 (0.069)    | 0.592 (0.066)    |
|                          | Exclude   | 0.667 (0.020) | 0.635 (0.076) | 0.782 (0.012) | 0.906 (0.025)    | 0.203 (0.084)    |
| Nuclei-based Model (M+D) | Include   | 0.721 (0.053) | 0.750 (0.054) | 0.766 (0.050) | 0.792 (0.071)    | 0.622 (0.087)    |
|                          | Exclude   | 0.696 (0.061) | 0.731 (0.076) | 0.786 (0.051) | 0.856 (0.091)    | 0.387 (0.097)    |

**Supplementary Table 3.** Distribution of AS-H and AS-L with or without MSI-high cases

|       | Include MSI      | Exclude MSI      |
|-------|------------------|------------------|
| AS-H  | 183 cases (58%)  | 180 cases (66%)  |
| AS-L  | 132 cases (42%)  | 93 cases (34%)   |
| Total | 315 cases (100%) | 273 cases (100%) |

## Predicting CRC chromosomal instability

**Supplementary Table 4.** Tumor cellularity and tumor cell to immune cell ratio in representative slides for correctly predicted AS-H, falsely predicted AS-H, and falsely predicted AS-L cases in tile-based models (TCGA-CM-4752, TCGA-A6-6653, and TCGA-F5-6464, respectively)

| TCGA-CM-4752-01Z-00-DX1   |        |        |        |        |        |        |        |        |
|---------------------------|--------|--------|--------|--------|--------|--------|--------|--------|
| AS-H prediction score (%) | 10-20  | 20-30  | 30-40  | 40-50  | 50-60  | 60-70  | 70-80  | 80-90  |
| No of tiles               | 48     | 107    | 137    | 169    | 151    | 100    | 39     | 6      |
| Tumor cells               | 8391   | 21317  | 29867  | 38968  | 37304  | 26068  | 10072  | 1748   |
| Immune cells              | 523    | 634    | 818    | 789    | 535    | 291    | 87     | 5      |
| Tumor cells ratio         | 174.81 | 199.22 | 218.01 | 230.58 | 247.05 | 260.68 | 258.26 | 291.33 |
| Immune cell ratio         | 10.90  | 5.93   | 5.97   | 4.67   | 3.54   | 2.91   | 2.23   | 0.83   |
| Tumor cell/immune cell    | 16.04  | 33.62  | 36.51  | 49.39  | 69.73  | 89.58  | 115.77 | 349.60 |
| TCGA-A6-6653-01Z-00-DX1   |        |        |        |        |        |        |        |        |
| AS-H prediction score (%) | 10-20  | 20-30  | 30-40  | 40-50  | 50-60  | 60-70  | 70-80  | 80-90  |
| No of tiles               | 2      | 15     | 35     | 27     | 45     | 41     | 35     | 5      |
| Tumor cells               | 447    | 2973   | 7028   | 5887   | 11953  | 12209  | 11019  | 1873   |
| Immune cells              | 6      | 68     | 230    | 172    | 293    | 272    | 229    | 8      |
| Tumor cells ratio         | 223.50 | 198.20 | 200.80 | 218.04 | 265.62 | 297.78 | 314.83 | 374.60 |
| Immune cell ratio         | 3.00   | 4.53   | 6.57   | 6.37   | 6.51   | 6.63   | 6.54   | 1.60   |
| Tumor cell/immune cell    | 74.50  | 43.72  | 30.56  | 34.23  | 40.80  | 44.89  | 48.12  | 234.13 |
| TCGA-F5-6464-01Z-00-DX1   |        |        |        |        |        |        |        |        |
| AS-H prediction score (%) | 0-10   | 10-20  | 20-30  | 30-40  | 40-50  | 50-60  | 60-70  | 70-80  |
| No of tiles               | 15     | 123    | 234    | 132    | 52     | 24     | 3      | 1      |
| Tumor cells               | 3005   | 19675  | 31582  | 17176  | 7122   | 4034   | 841    | 292    |
| Immune cells              | 180    | 1011   | 1521   | 1052   | 453    | 151    | 5      | 0      |
| Tumor cells ratio         | 200.33 | 159.96 | 134.97 | 130.12 | 136.96 | 168.08 | 280.33 | 292.00 |
| Immune cell ratio         | 12.00  | 8.22   | 6.50   | 7.97   | 8.71   | 6.29   | 1.67   | 0.00   |
| Tumor cell/immune cell    | 16.69  | 19.46  | 20.76  | 16.33  | 15.72  | 26.72  | 168.20 | inf    |

**Supplementary Table 5.** The 10 morphologic features with a high c-index of univariate Cox proportional hazard models for overall survival (OS) and disease-free survival (DFS)

| OS                      | c-index  | DFS                      | c-index  |
|-------------------------|----------|--------------------------|----------|
| Std major axis length   | 0.607814 | Mean intensity B sd      | 0.688108 |
| Mean intensity B sd     | 0.593903 | Std minor axis length    | 0.682124 |
| Mean intensity A sd     | 0.590499 | Mean intensity gray mean | 0.673897 |
| Mean intensity gray sd  | 0.587243 | Std area                 | 0.65445  |
| Std intensity A sd      | 0.579621 | Mean intensity B mean    | 0.650711 |
| Std intensity S sd      | 0.579029 | Std perimeter            | 0.646971 |
| Std intensity A mean    | 0.576883 | Std intensity A sd       | 0.635752 |
| Std intensity gray sd   | 0.571333 | Mean intensity A mean    | 0.622289 |
| Std intensity gray mean | 0.566894 | Mean intensity S mean    | 0.606582 |
| Mean circularity        | 0.563046 | Mean intensity gray sd   | 0.600598 |

## Predicting CRC chromosomal instability

**Supplementary Table 6.** Morphologic features of tumor nuclei significantly correlated with copy number signatures ( $P < 0.05$ )

| Signature | Morphology                                                                                                                                                                                                                                                                 |
|-----------|----------------------------------------------------------------------------------------------------------------------------------------------------------------------------------------------------------------------------------------------------------------------------|
| CX1       | Mean eccentricity, std intensity A mean                                                                                                                                                                                                                                    |
| CX2       | Mean area, mean major axis length, mean minor axis length, mean perimeter, mean intensity B mean, std area, std minor axis length, std perimeter, std intensity gray sd                                                                                                    |
| CX3       | Std minor axis length                                                                                                                                                                                                                                                      |
| CX4       | Mean area, mean major axis length, mean minor axis length, mean perimeter                                                                                                                                                                                                  |
| CX6       | Mean major axis length, mean circularity, mean eccentricity, mean intensity gray mean, mean intensity S mean, mean intensity B mean, std area, std major axis length, std minor axis length, std perimeter, std intensity A mean, std intensity A sd, std intensity B mean |
| CX8       | Mean area, mean major axis length, mean minor axis length, mean perimeter, std area, std minor axis length                                                                                                                                                                 |
| CX9       | Std intensity A mean                                                                                                                                                                                                                                                       |
| CX10      | Mean intensity gray mean, mean intensity gray sd, mean intensity A sd, mean intensity B mean, mean intensity B sd, std intensity A mean, std intensity A sd                                                                                                                |
| CX11      | Mean solidity, mean intensity S sd, std area, std minor axis length, std perimeter, std intensity gray sd, std intensity S mean, std intensity S sd, std intensity B sd                                                                                                    |
| CX16      | Mean intensity B sd                                                                                                                                                                                                                                                        |
| CX17      | Std area, std major axis length, std minor axis length, std perimeter                                                                                                                                                                                                      |

**Supplementary Table 7.** Correlation between clusters and clinical and molecular features

|          |              | Cluster 1 (%) | Cluster 2 (%) | P value   |
|----------|--------------|---------------|---------------|-----------|
| Age      | < 65         | 48 (14.4%)    | 103 (33.1%)   | 0.56      |
|          | ≥ 65         | 46 (14.8%)    | 114 (36.7%)   |           |
| Sex      | Female       | 48 (15.4%)    | 107 (34.4%)   | 0.776     |
|          | Male         | 46 (14.8%)    | 110 (35.4%)   |           |
| pTNM     | I/II         | 41 (14.0%)    | 114 (39.0%)   | 0.085     |
|          | III/IV       | 49 (16.8%)    | 88 (30.1%)    |           |
| pT stage | pT1-2        | 15 (4.8%)     | 42 (13.5%)    | 0.488     |
|          | pT3-4        | 79 (25.3%)    | 176 (56.4%)   |           |
| pN stage | pN0          | 44 (14.1%)    | 126 (40.4%)   | 0.074     |
|          | pN1-2        | 50 (16.0%)    | 92 (29.5%)    |           |
| pM stage | pM0          | 63 (24.5%)    | 152 (59.1%)   | 0.259     |
|          | pM1          | 16 (6.2%)     | 26 (10.1%)    |           |
| MSI      | Stable/low   | 91 (29.1%)    | 181 (57.8%)   | 0.002*    |
|          | High         | 4 (1.3%)      | 37 (11.8%)    |           |
| CIMP     | Negative/low | 73 (25.4%)    | 174 (60.6%)   | 0.009*    |
|          | High         | 4 (1.4%)      | 36 (12.5%)    |           |
| BRAF     | Wildtype     | 85 (27.5%)    | 184 (59.5%)   | 0.136     |
|          | Mutant       | 8 (2.6%)      | 32 (10.4%)    |           |
| KRAS     | Wildtype     | 53 (17.2%)    | 122 (39.5%)   | 0.934     |
|          | Mutant       | 40 (12.9%)    | 94 (30.4%)    |           |
| TP53     | Wildtype     | 24 (7.8%)     | 81 (26.2%)    | 0.047*    |
|          | Mutant       | 69 (22.3%)    | 135 (43.7%)   |           |
| AS       | Low          | 22 (7.0%)     | 109 (34.8%)   | < 0.001** |
|          | High         | 73 (23.3%)    | 109 (34.8%)   |           |

\* $P < 0.05$ , \*\* $P < 0.001$ .
